# Supplementary material for: GDP-D-mannose epimerase regulates male gametophyte development, plant growth and leaf senescence in Arabidopsis
Source: PubMed Central journal article supplement (PMC5583398; doi:10.1038/s41598-017-10765-5), 2017-09-04
Supplement: 41598_2017_10765_MOESM1_ESM.pdf [file 41598_2017_10765_MOESM1_ESM.pdf]

## Supplementary Information

### **GDP-D-mannose epimerase regulates male gametophyte development, plant growth and leaf senescence in *Arabidopsis***

Tiancong Qi<sup>1</sup>, Zhipeng Liu<sup>2</sup>, Meng Fan<sup>1</sup>, Yan Chen<sup>3</sup>, Haixia Tian<sup>3</sup>, Dewei Wu<sup>1</sup>, Hua Gao<sup>1</sup>, Chunmei Ren<sup>3\*</sup>, Susheng Song<sup>4\*</sup>, Daoxin Xie<sup>1,\*</sup>

1 Tsinghua-Peking Center for Life Sciences, MOE Key Laboratory of Bioinformatics, School of Life Sciences, Tsinghua University, Beijing 100084, China.

2 State Key Laboratory of Grassland Agro-ecosystems, College of Pastoral Agriculture Science and Technology, Lanzhou University, Lanzhou 730020, China.

3 College of Bioscience and Biotechnology, Crop Gene Engineering Key Laboratory of Hunan Province, Hunan Agricultural University, Changsha, Hunan 410128, China.

4 Beijing Key Laboratory of Plant Gene Resources and Biotechnology for Carbon Reduction and Environmental Improvement, College of Life Sciences, Capital Normal University, Beijing 100048, China.

\*Correspondence: [daoxinlab@tsinghua.edu.cn](mailto:daoxinlab@tsinghua.edu.cn), [songsslab@163.com](mailto:songsslab@163.com), or [rencm66@163.com](mailto:rencm66@163.com)

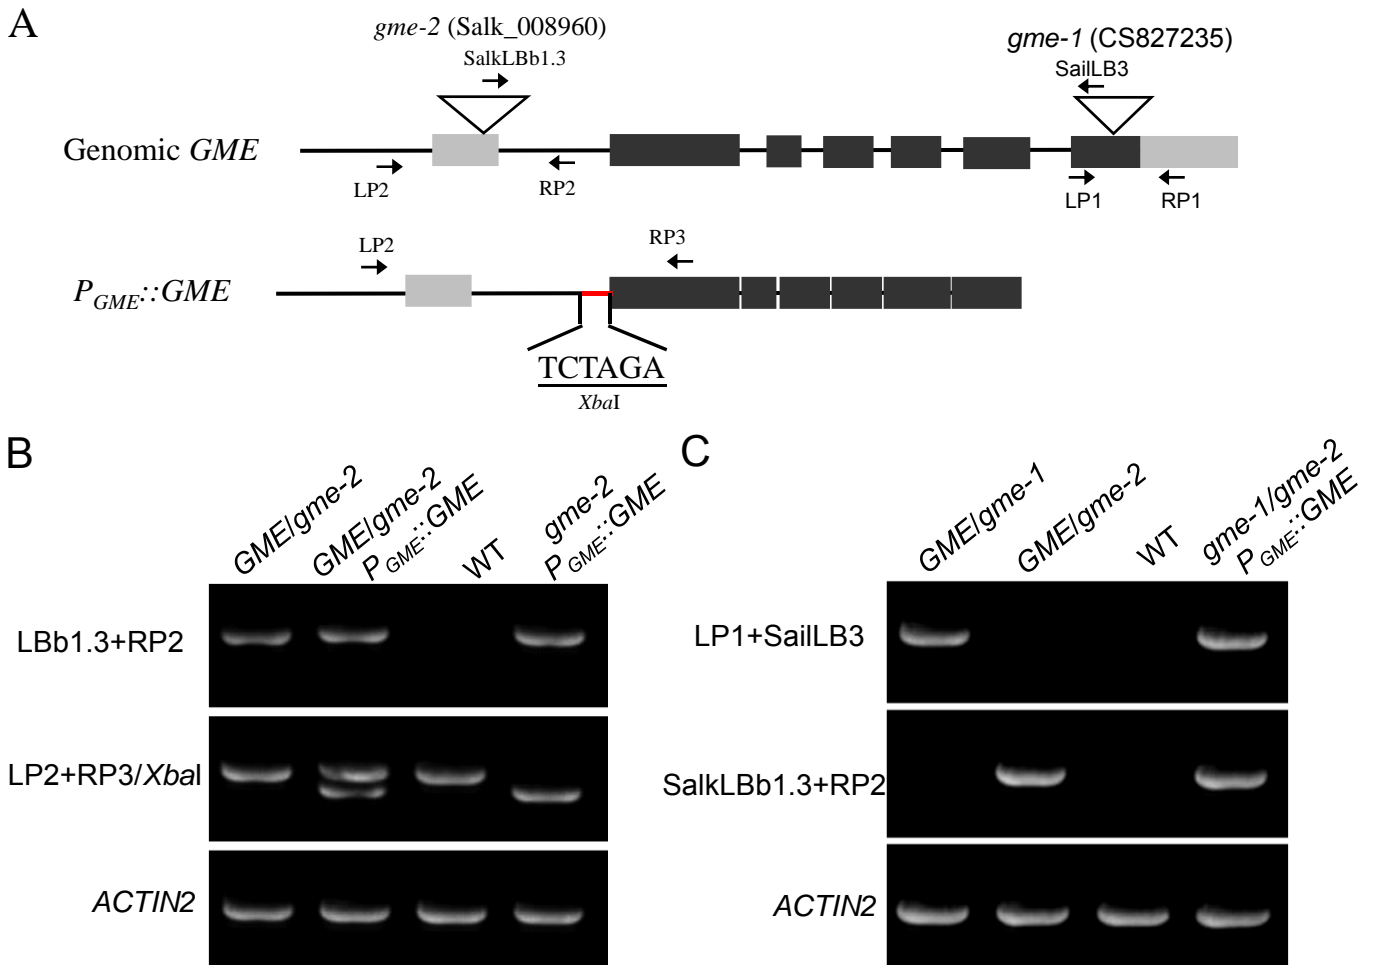

**Supplemental Figure 1. Genotyping of *gme* mutants and complementary transgenic lines.**

(A) Schematic diagrams showing the T-DNA insertion site in *gme-2*, and the  $P_{GME}::GME$  vector. The grey rectangle, black rectangle and triangle represent the UTR, exon, and T-DNA insertion site, respectively. The red line indicates the inserted artificial sequence in the  $P_{GME}::GME$  vector. The primers indicated by arrows were used to identify the mutant background in (B) and (C).

(B) PCR to identify the genetic background of the  $GME/gme-2$ ,  $GME/gme-2 P_{GME}::GME$ , WT and  $gme-2/gme-2 P_{GME}::GME$  plants. The top panel shows the PCR products for the *gme-2* T-DNA insertion using primers RP2 and LBb1.3. The middle panel shows the results of the digestion of the PCR products amplified by primers LP2 and RP3 with *Xba*I. The bottom panel shows the PCR products for *ACTIN2* as a control.

(C) PCR to identify the genetic background of the  $GME/gme-1$ ,  $GME/gme-2$ , WT and  $gme-1/gme-2 P_{GME}::GME$  plants. The top and middle panels, respectively, show the PCR products for the *gme-1* T-DNA insertion (LP1 and LB3) and *gme-2* T-DNA insertion (LP2 and LBb1.3). The bottom panel shows the PCR products for *ACTIN2* as a control.

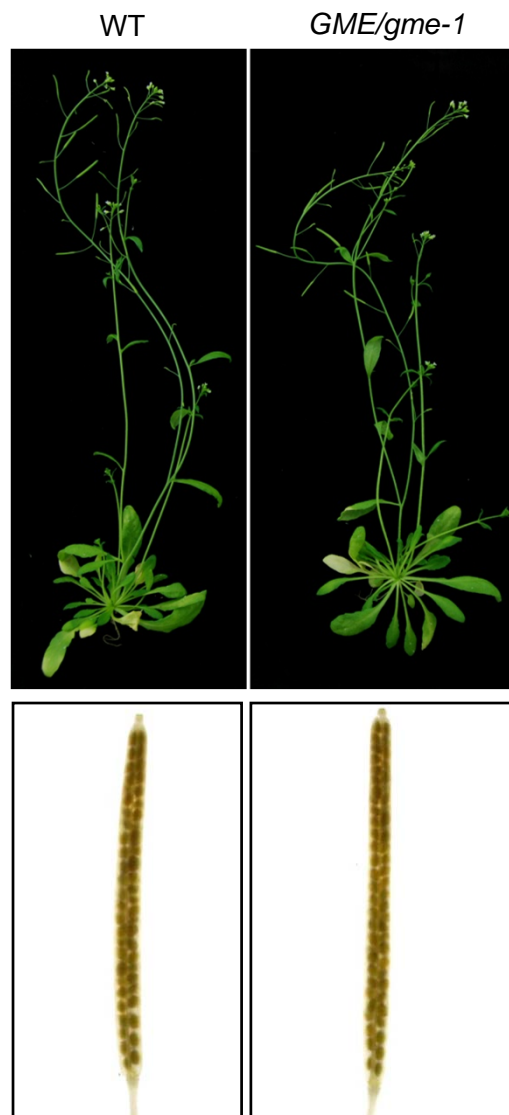

**Supplemental Figure 2. Phenotype of a *GME/gme-1* heterozygous plant.**

Six-week-old WT and *GME/gme-1* plants (top). The siliques were bleached with ethanol and imaged (bottom). As shown, the *GME/gme-1* plant grew normally and exhibited similar fertility to wild type.

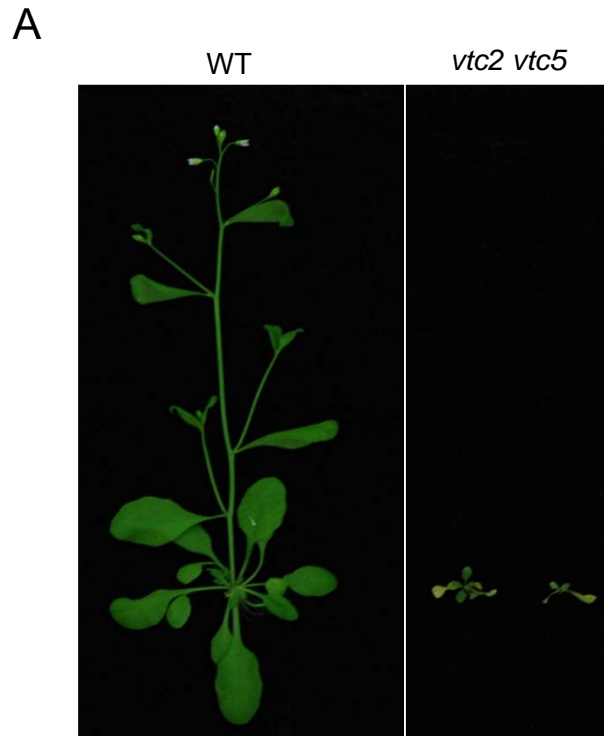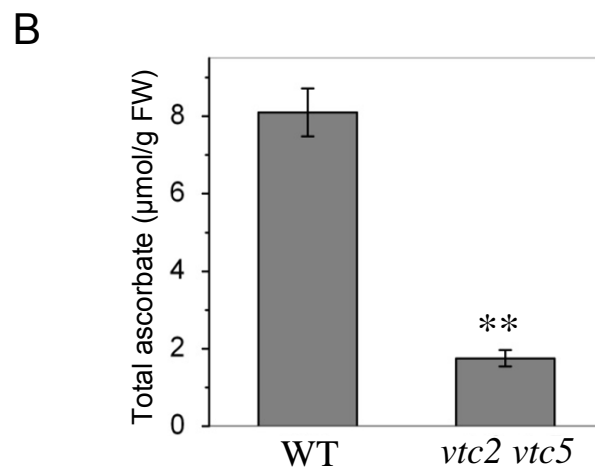

**Supplemental Figure 3. Plant phenotype and total ascorbate content in the *vtc2 vtc5* double mutant.**

(A) Morphology of 5-week-old WT and *vtc2 vtc5* double mutant plants.

(B) Total ascorbate contents in the leaves of 4-week-old Col-0 WT and *vtc2 vtc5* plants. Error bars represent the SE (n=3). Asterisks represent Student's *t*-test significance compared with wild type (\*P<0.05, \*\*P<0.01).

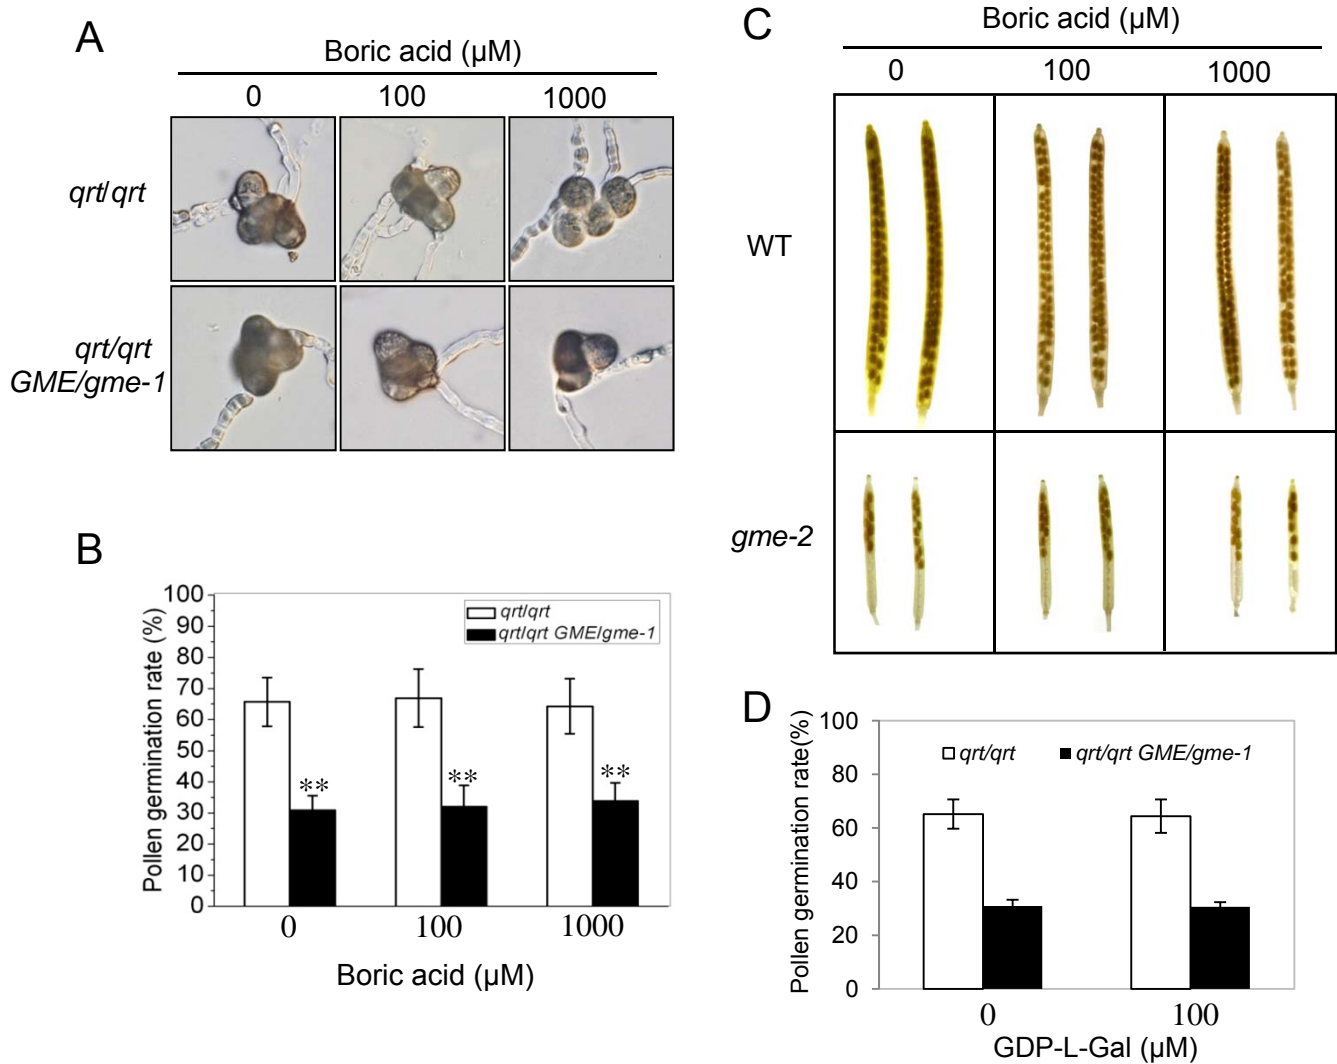

**Supplemental Figure 4. Treatment with boric acid or GDP-L-Gal could not rescue the fertility of the *gme* mutant.**

(A and B) *In vitro* pollen germination (A) and the pollen germination rates (B) of *qrt/qrt* and *qrt/qrt GME/gme-1* on pollen germination medium containing the indicated concentrations of boric acid. Error bars represent the SE (n=3).

(C) Inflorescences of 5-week-old WT and *gme-2* plants were treated with 0, 100 or 1000  $\mu\text{M}$  boric acid for 10 days. The siliques were derived from flower buds of WT and *gme-2* plants treated with 0, 10 or 100  $\mu\text{M}$  boric acid. Asterisks represent Student's *t*-test significance compared with *qrt/qrt* (\*\*P<0.01).

(E) The pollen germination rates of *qrt/qrt* and *qrt/qrt GME/gme-1* on pollen germination medium containing the indicated concentration of GDP-L-gal sodium salt. Error bars represent the SE (n=3).

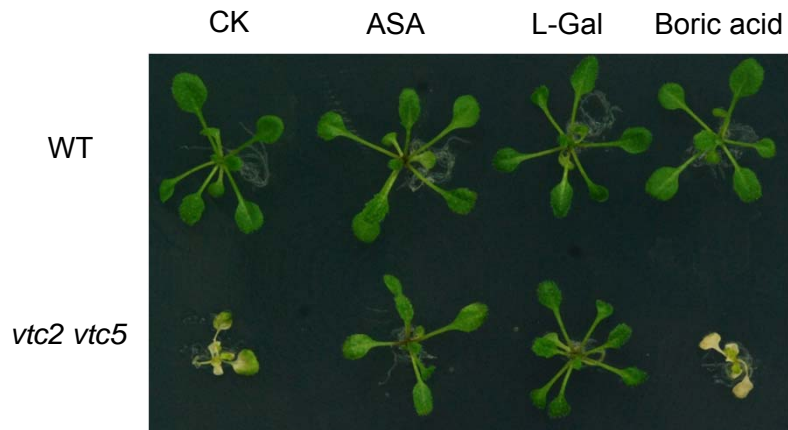

**Supplemental Figure 5. The growth of *vtc2 vtc5* could be rescued by treatment with ASA or L-Gal.**

Three-week-old seedlings of Col-0 WT and *vtc2 vtc5* double mutant plants grown on boric acid-free MS medium treated with mock, 100  $\mu$ M ASA, 100  $\mu$ M L-Gal or 100  $\mu$ M boric acid.

---

Supplemental Table 1. Genetic transmission analysis of *vtc2* and *vtc5* alleles

---

| Genotype                            | T-DNA <sup>+</sup> | T-DNA <sup>-</sup> | TE(%) |
|-------------------------------------|--------------------|--------------------|-------|
| ♀ WT × ♂ <i>VTC2/vtc2 vtc5/vtc5</i> | 134                | 141                | 48.7  |
| ♀ <i>VTC2/vtc2 vtc5/vtc5</i> × ♂ WT | 107                | 101                | 51.4  |
| ♀ WT × ♂ <i>vtc2/vtc2 VTC5/vtc5</i> | 103                | 108                | 48.8  |
| ♀ <i>vtc2/vtc2 VTC5/vtc5</i> × ♂ WT | 112                | 108                | 50.9  |

---

Progeny containing a T-DNA insertion (*vtc2* for the top two panels and *vtc5* for the bottom two panels) were identified by PCR. Transmission efficiency (TE)=Number of progeny with a T-DNA insertion/Number of progeny × 100%. WT, Col-0 wild type.

---

**Supplemental Table 2. Primers used for identification of *gme* T-DNA mutants and generation of constructs.**

|                                        |                                       |
|----------------------------------------|---------------------------------------|
| <i>gme-1</i> (CS827235)-LP1            | GACAAAATCAGATTTCCGTG                  |
| <i>gme-1</i> (CS827235)-RP1            | GCTGAACTTAAAAGGCCATATTTG              |
| <i>gme-1</i> (CS827235)-SAILB3         | TAGCATCTGAATTTTCATAACCAATCTCGATACAC   |
| <i>gme-2</i> (SALK_008960)-LP2         | TTCCTCTTCCTCAAATCTCTG                 |
| <i>gme-2</i> (SALK_008960)-RP2         | AGAGTTTTGACAGAGGTAAG                  |
| <i>gme-2</i> (SALK_008960)-SalkLBb1.3  | ATTTTGCCGATTTTCGGAAC                  |
| <i>GME</i> -LP2                        | TTCCTCTTCCTCAAATCTCTG                 |
| <i>GME</i> -RP3                        | AATCACAGAGTGATTACTCTG                 |
| <i>GME</i> pro-HindIII-Forward         | CCCAAGCTTGATCAAGATGACTAATTTAAC        |
| <i>GME</i> pro-XbaI-Reverse            | CTAGTCTAGATCTACATTAACAAAACAAATCTG     |
| <i>GME</i> -XbaI-Forward               | TGCTCTAGAATGGGAACTACCAATGGAACAG       |
| <i>GME</i> -SacI-Reverse               | ATCGAGCTCTCACTCTTTTCCATCAGCCGC        |
| 35S:: <i>GME</i> -GFP-EcoRI-Forward    | CCGGAATTCATGGGAACTACCAATGGAACAGACTATG |
| 35S:: <i>GME</i> -GFP-BamHI-Reverse    | CGCGGATCCTCACTCTTTTCCATCAGCCGC        |
| 35S:: <i>GME</i> -GFP-XhoI-Forward     | ACCGCTCGAGATGGGAACTACCAATGGAAC        |
| 35S:: <i>GME</i> -GFP-EcoRI-Reverse    | GGGGAATTCGCTCTTTTCCATCAGCCGCGC        |
| <i>GME</i> -Realtime-Forward           | GGAGCTGGAGGTTTCATTGC                  |
| <i>GME</i> -Realtime-Reverse           | CGTAATGACCTTCGTGCTTCAA                |
| <i>GME</i> -RT-Forward                 | ATGCTTCGAGTGCTTGTATC                  |
| <i>GME</i> -RT-Reverse                 | GAAAGCAGCTGGAGCCTTCTC                 |
| <i>vtc2-2</i> (CS876707)-LP            | CGGAGAGGTAAATCATAGAC                  |
| <i>vtc2-2</i> (CS876707)-RP            | CCATACTCTATCGGACTAAC                  |
| <i>vtc2-2</i> (CS876707)-SAILB3        | TAGCATCTGAATTTTCATAACCAATCTCGATACAC   |
| <i>vtc5-2</i> (SALK_135468)-LP         | GCTGAAGCCGATAATCCGTA                  |
| <i>vtc5-2</i> (SALK_135468)-RP         | CCTCCATGCCTTCTCTCTG                   |
| <i>vtc5-2</i> (SALK_135468)-SalkLBb1.3 | ATTTTGCCGATTTTCGGAAC                  |
| <i>CABI</i> -Realtime-Forward          | GCAAGGAACCGTGAAGTAGAA                 |



|                                 |                             |
|---------------------------------|-----------------------------|
| <i>CAB1</i> -Realtime-Reverse   | TCCGAACTTGACTCCGTTTC        |
| <i>CAB2</i> -Realtime-Forward   | TCAATCTTTTGAATTCGAGTGAGA    |
| <i>CAB2</i> -Realtime-Reverse   | TCCACCACAAACACAAACCTAC      |
| <i>RBCS</i> -Realtime-Forward   | CGCTCCTTTCAACGGACTTA        |
| <i>RBCS</i> -Realtime-Reverse   | AGTAATGTCGTTGTTAGCCTTGC     |
| <i>SAG13</i> -Realtime-Forward  | AGGAAAACCTCAACATCCTCGTC     |
| <i>SAG13</i> -Realtime-Reverse  | GCTGACTCGAGATTTGTAGCC       |
| <i>SAG21</i> -Realtime-Forward  | CATTCCTCGGATATATCTCTCCTT    |
| <i>SAG21</i> -Realtime-Reverse  | TTCTTGAAAAGAGAGAAAACAGACTTT |
| <i>SEN4</i> -Realtime-Forward   | AAGGTGACAAAGAGCAACAATTC     |
| <i>SEN4</i> -Realtime-Reverse   | CTCTCTAATGGGTGTGTCATCG      |
| <i>ACTIN2</i> -RT-Forward       | GCACCCTGTTCTTCTTACCG        |
| <i>ACTIN2</i> -RT-Reverse       | AACCCTCGTAGATTGGCACA        |
| <i>ACTIN2</i> -Realtime-Forward | CCGCTCTTTCTTTCCAAGC         |
| <i>ACTIN2</i> -Realtime-Reverse | CCGGTACCATTGTCACACAC        |
